# Supplementary material for: Preferential enrichment and extraction of laser-synthesized nanoparticles in organic phases
Source: publisher site journal article supplement (doi:10.3762/bjnano.16.20), 2025-02-20
Supplement: Additional file 1 [file 2190-4286-16-20-S1.pdf]

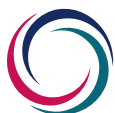

## Supporting Information

for

### **Preferential enrichment and extraction of laser-synthesized nanoparticles in organic phases**

Theo Fromme, Maximilian L. Spiekermann, Florian Lehmann, Stephan Barcikowski, Thomas Seidensticker and Sven Reichenberger

*Beilstein J. Nanotechnol.* **2025**, *16*, 254–263. [doi:10.3762/bjnano.16.20](https://doi.org/10.3762/bjnano.16.20)

## Additional figures and tables

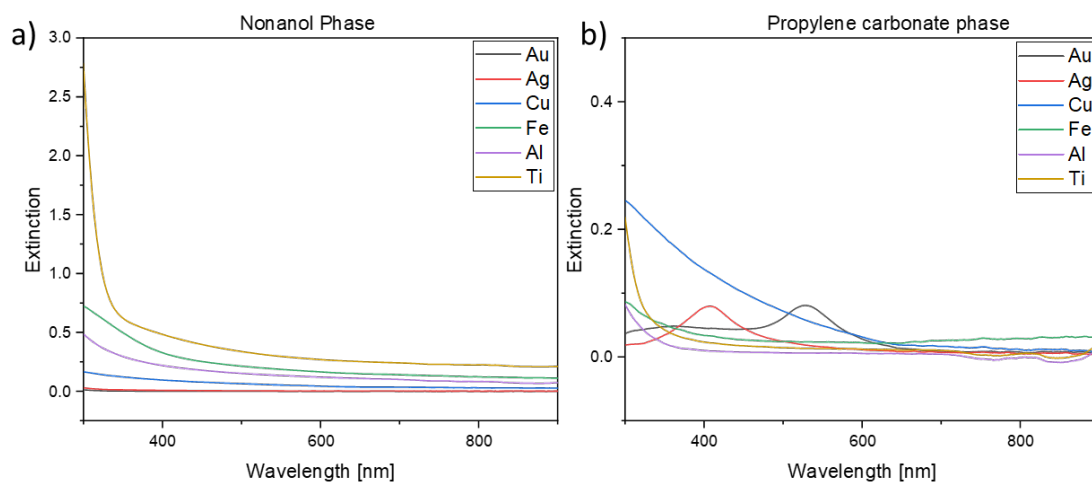

**Figure S1:** UV-vis extinction spectra of the gained colloids from the six different metals (Au, Ag, Cu, Fe, Al, and Ti) in the TMS consisting of propylene carbonate and 1-nonanol.

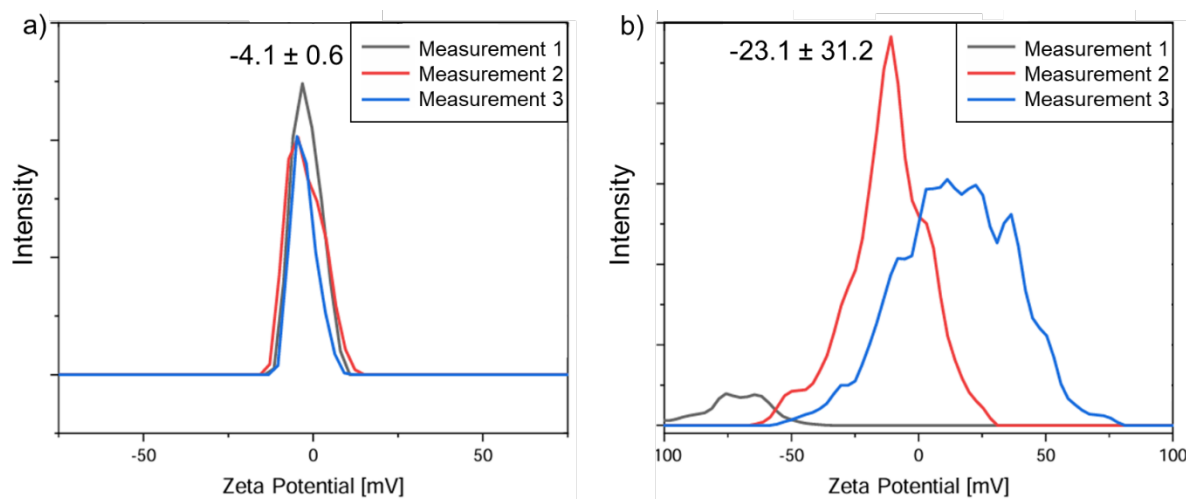

**Figure S2:** Zeta potential of iron nanoparticles in (a) 1-nonanol and (b) propylene carbonate obtained by LAL in the TMS of 1-nonanol and propylene carbonate.

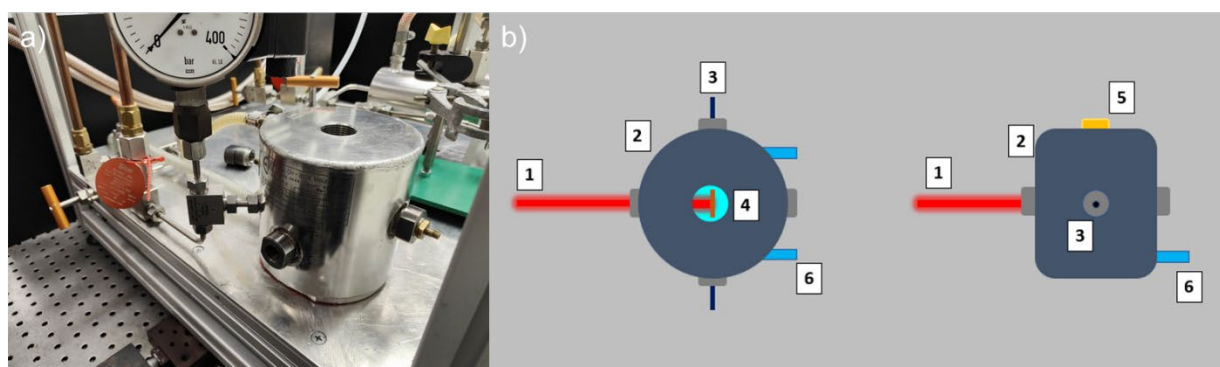

**Figure S3:** (a) Photograph of the batch vessel with a heating coat. (b) Schematic depiction of the batch vessel. The numbers indicate the following: 1 laser beam, 2 ablation chamber with a heating coat, 3 fiber UV-vis connector (not used in this study), 5 cover, 6 heating water connectors.

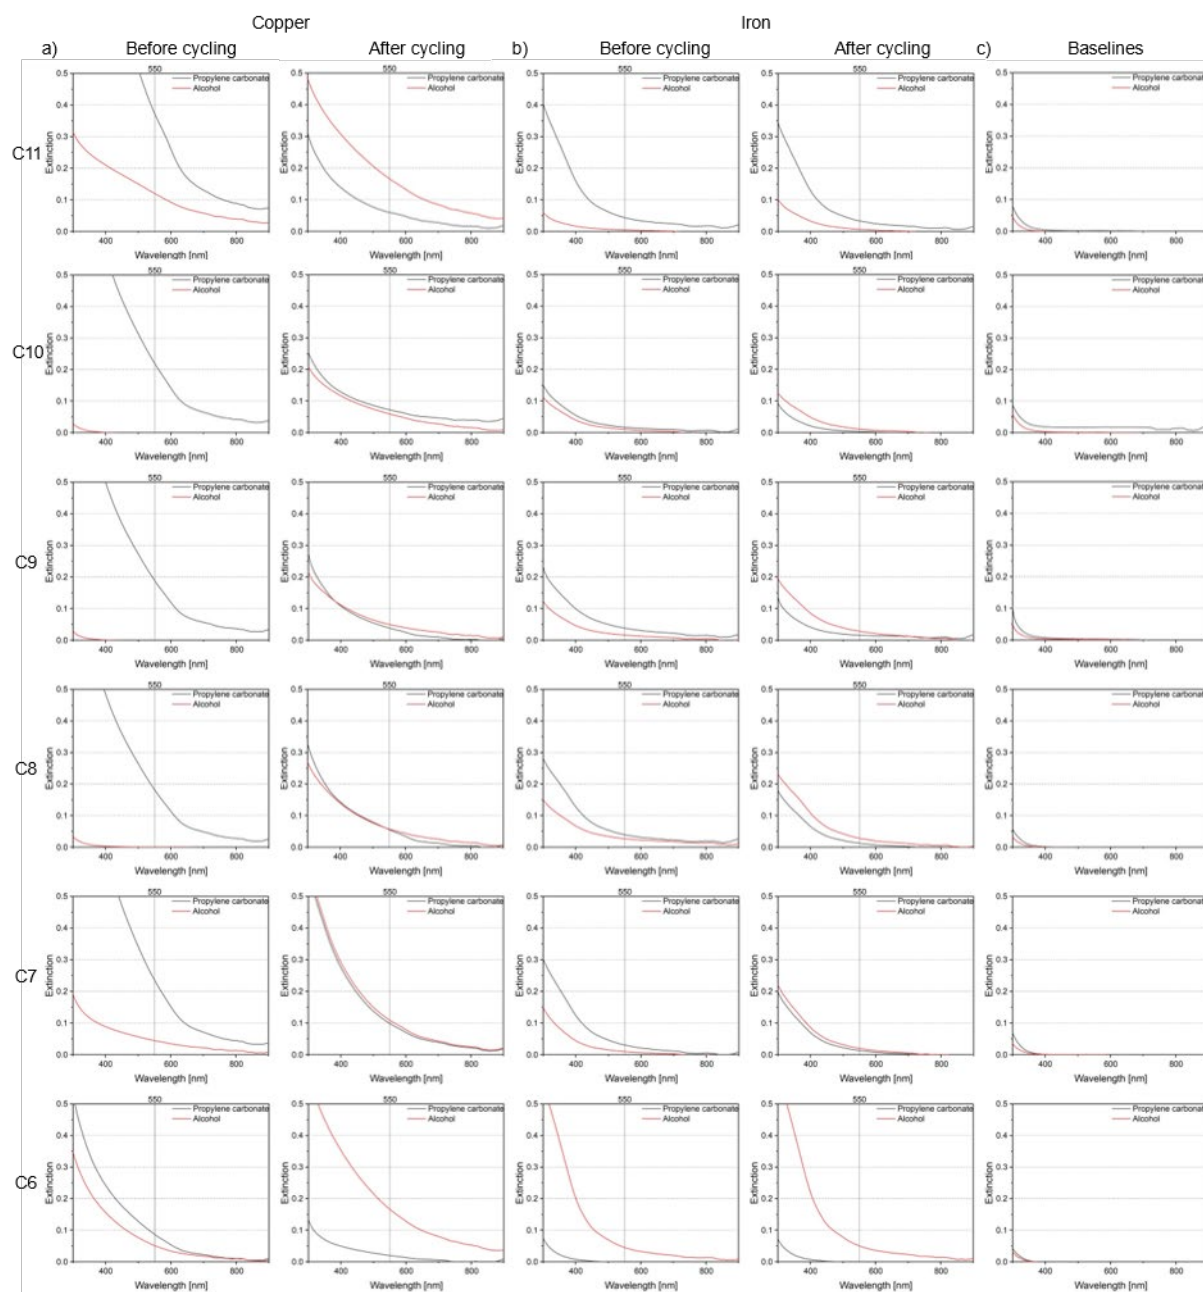

**Figure S4:** Raw UV-vis extinction spectra gained for (a) copper and (b) iron colloids in TMSs consisting of propylene carbonate and an alcohol with a carbon chain length between six and eleven before and after cycling. (c) UV-vis extinction spectra baselines gained from TMSs consisting of propylene carbonate and an alcohol with a carbon chain length of six to eleven after phase separation from the monophasic state.

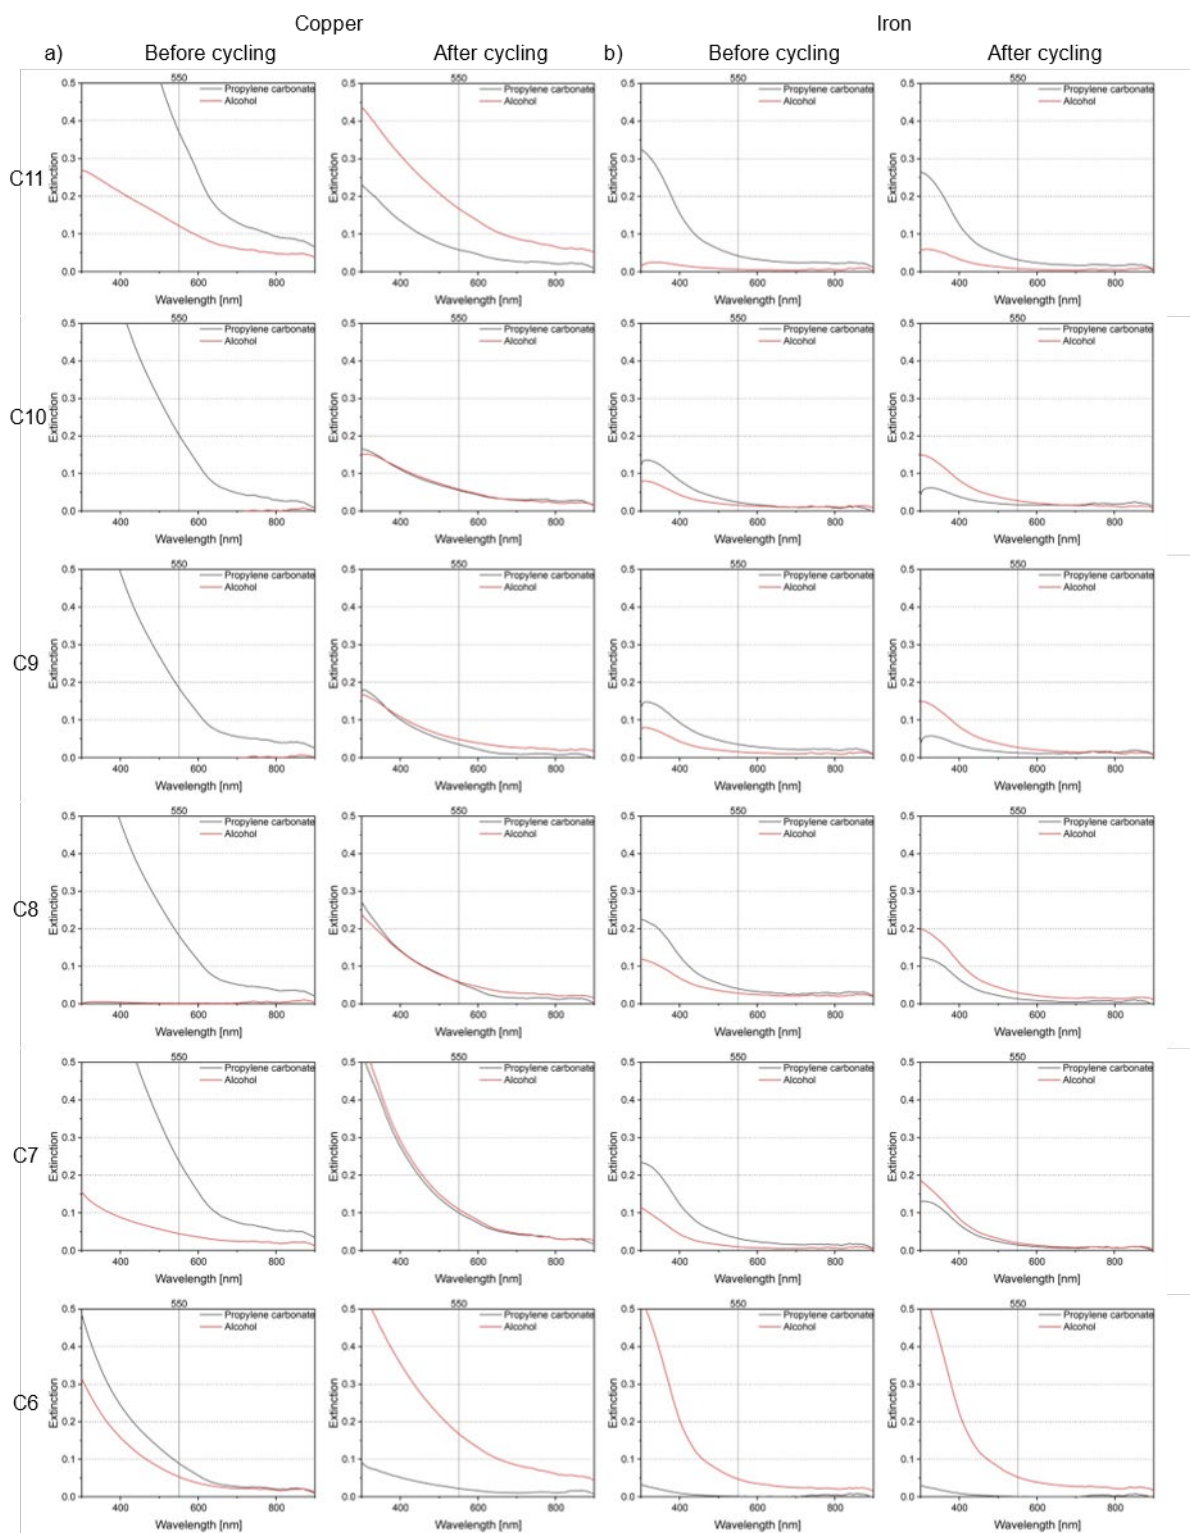

**Figure S5:** Baseline-corrected UV-vis extinction spectra gained for (a) copper and (b) iron colloids in TMSs consisting of propylene carbonate and an alcohol with a carbon chain length of six to eleven before and after cycling. The baseline-corrected UV-vis extinction spectra were obtained by subtraction of the respective baselines (Figure S4c) from the UV-vis extinction spectra of the raw colloids (Figure S4a,b).

**Table S1:** Extinctions at a wavelength of 550 nm gained from the baseline-corrected UV–vis extinction spectra (Figure S5) of the copper colloids in TMSs consisting of propylene carbonate and an alcohol with a carbon chain length of six to eleven before and after cycling.

| Alcohol chain length | Extinction at 550 nm of the propylene carbonate phase [-] |               | Extinction at 550 nm of the alcohol phase [-] |               |
|----------------------|-----------------------------------------------------------|---------------|-----------------------------------------------|---------------|
|                      | before cycling                                            | after cycling | before cycling                                | after cycling |
| 11                   | 0.371                                                     | 0.058         | 0.121                                         | 0.167         |
| 10                   | 0.203                                                     | 0.055         | 0                                             | 0.057         |
| 9                    | 0.185                                                     | 0.035         | 0                                             | 0.048         |
| 8                    | 0.182                                                     | 0.056         | 0.001                                         | 0.058         |
| 7                    | 0.238                                                     | 0.100         | 0.044                                         | 0.109         |
| 6                    | 0.089                                                     | 0.021         | 0.052                                         | 0.168         |

**Table S2:** Extinctions at a wavelength of 550 nm gained from the baseline-corrected UV–vis extinction spectra (Figure S5) of the gained iron colloids in TMSs consisting of propylene carbonate and an alcohol with a carbon chain length of six to eleven before and after cycling.

| Alcohol chain length | Extinction at 550 nm of the propylene carbonate phase [-] |               | Extinction at 550 nm of the alcohol phase [-] |               |
|----------------------|-----------------------------------------------------------|---------------|-----------------------------------------------|---------------|
|                      | Before cycling                                            | After cycling | Before cycling                                | After cycling |
| 11                   | 0.042                                                     | 0.031         | 0.006                                         | 0.008         |
| 10                   | 0.023                                                     | 0.016         | 0.015                                         | 0.027         |
| 9                    | 0.035                                                     | 0.012         | 0.015                                         | 0.027         |
| 8                    | 0.040                                                     | 0.013         | 0.028                                         | 0.029         |
| 7                    | 0.032                                                     | 0.014         | 0.009                                         | 0.019         |
| 6                    | 0.046                                                     | 0.052         | 9.7E-4                                        | 3.69E-4       |

**Table S3:** Fractions of the colloidal Cu and Fe NPs in the propylene carbonate phase of TMSs consisting of propylene carbonate and an alcohol with a chain length of six to eleven before and after cycling.

| Alcohol chain length | Fraction of colloidal Cu NP in the propylene carbonate phase [-] |               | Fraction of the colloidal Fe NP in the propylene carbonate phase [-] |               |
|----------------------|------------------------------------------------------------------|---------------|----------------------------------------------------------------------|---------------|
|                      | before cycling                                                   | after cycling | before cycling                                                       | after cycling |
| 11                   | 0.75                                                             | 0.26          | 0.87                                                                 | 0.80          |
| 10                   | 1.00                                                             | 0.49          | 0.60                                                                 | 0.38          |
| 9                    | 1.00                                                             | 0.42          | 0.69                                                                 | 0.32          |
| 8                    | 0.99                                                             | 0.49          | 0.59                                                                 | 0.31          |
| 7                    | 0.84                                                             | 0.48          | 0.77                                                                 | 0.42          |
| 6                    | 0.62                                                             | 0.11          | 0.98                                                                 | 0.99          |
